# Supplementary material for: A Systematic Review of Music Therapy Practice and Outcomes with Acute Adult Psychiatric In-Patients
Source: PLoS One. 2013 Aug 2;8(8):e70252. doi: 10.1371/journal.pone.0070252 (PMC3732280; doi:10.1371/journal.pone.0070252)
Supplement: Information S5 — Coverage of themes. (DOCX) [file pone.0070252.s005.docx]

**Supplementary Information 5. Paper characteristics and coverage of themes***

| **Reference** | **Country** | **Clinical Aims** | | | | | | | | **Setting specific themes** | | | | | **Patient specific themes** | | | | |
| --- | --- | --- | --- | --- | --- | --- | --- | --- | --- | --- | --- | --- | --- | --- | --- | --- | --- | --- | --- |
|  |  | **A1** | **A2** | **A3** | **A4** | **A5** | **A6** | **A7** | **A8** | **S1** | **S2** | **S3** | **S4** | **S5** | **P1** | **P2** | **P3** | **P4** | **P5** |
| **Abs (1983) 27** | Germany | x |  | x | x | x | x |  |  | x | x |  |  |  | x |  | x |  |  |
| Ansdell & Meehan (2010) 28 | UK |  |  | x |  |  |  | x |  |  |  |  |  |  |  |  | x |  |  |
| **Arnason (1993) 29** | Canada | x | x | x |  |  |  | x | x | x | x | x | x | x | x | x | x | x | x |
| **Baumgarten & Mahns (1986)30** | Germany |  |  |  |  |  |  |  |  |  |  |  |  |  |  |  | x | x | x |
| Blake & Bishop (1994) 31 | USA |  | x | x |  | x | x | x |  |  |  |  |  | x |  |  |  |  | x |
| Bonde, Hannibal. & Pedersen (2012).32 | Denmark | x | x | x | x | x | x | x | x | x | x | x | x | x |  | x |  |  |  |
| **Braswell, Brooks, Decuir, Humphrey, Jacobs & Sutton (1986)33** | USA |  |  |  |  |  |  |  |  |  |  |  |  |  |  | x |  |  |  |
| Bunt, Pike, & Wren (1987)34 | UK | x | x | x | x | x |  | x |  |  |  |  |  | x |  | x |  |  |  |
| Cassity & Cassity (1994)35 | USA |  |  |  |  |  |  |  |  |  |  |  |  |  |  | x |  |  |  |
| **Cassity & Cassity (2006)36** | USA |  |  |  |  |  |  | x | x |  |  |  |  | x |  |  |  |  |  |
| **Cassity (1976)37** | USA |  | x |  |  |  |  |  | x |  |  |  |  |  |  | x |  |  |  |
| **Clemencic-Jones (1998)38** | Australia | x | x | x | x | x | x | x | x | x |  |  |  |  |  | x | x |  |  |
| **Cullen (1993)39** | Australia |  | x | x | x |  |  |  |  |  |  |  |  | x |  |  |  |  | x |
| **Davies & Richards (1998)40** | UK | x | x |  |  |  |  | x |  | x |  | x | x | x | x | x | x |  |  |
| De Backer & Van Camp (2003)41 | Belgium |  | x |  | x | x |  | x |  | x | x | x |  |  | x | x |  |  | x |
| De Backer, J. (2006) 10 | Denmark |  | x |  |  | x |  | x |  | x |  | x |  |  |  | x | x | x | x |
| Dvorkin (2008)43 | USA | x | x | x | x |  |  | x | x |  |  |  |  | x | x | x | x |  |  |
| **Dye (1994) 44** | Australia |  |  |  |  |  |  |  |  |  |  |  |  |  |  | x |  |  |  |
| Exner (1998)45 | Germany |  | x | x |  | x | x | x |  |  |  |  |  |  |  |  |  | x |  |
| Eyre (2011)46 | USA |  | x |  |  | x | x |  |  |  |  |  |  |  | x | x | x |  |  |
| **Featherstone (2008)47** | Australia | x | x |  |  |  |  | x |  | x |  |  |  | x | x |  |  |  | x |
| Fenwick (1970)48 | UK |  | x |  | x |  |  | x | x | x |  |  |  |  |  | x |  | x |  |
| Frederiksen & Lindvang (1998)49 | Denmark |  | x |  | x |  |  | x |  | x | x | x | x | x | x | x |  |  | x |
| **Gibson, Novakovic & Francis (2008)50** | UK | x |  |  |  |  |  |  | x |  |  | x |  |  |  |  |  |  |  |
| Gold, Solli, Kraeger & Lie (2009) 4 | Norway | x | x |  | x | x | x |  | x |  |  |  |  |  |  |  |  |  |  |
| **Goldberg (1989)51** | USA | x |  |  | x |  |  | x | x |  |  |  |  | x | x | x |  |  |  |
| **Goldberg (1994)52** | USA |  | x |  |  |  |  | x | x |  | x | x |  | x | x |  |  |  | x |
| **Goldberg, McNiel & Binder (1988)53** | USA | x |  |  |  |  |  | x | x |  |  |  | x | x |  |  |  |  |  |
| **Grandison (1991)54** | UK |  | x | x |  |  |  |  |  | x | x | x |  | x |  | x |  |  | x |
| **Haase & Reinhardt (2011)55** | Germany |  | x | x |  | x |  | x |  | x |  |  |  |  | x |  | x | x | x |
| Hannibal (2002)56 | Denmark |  | x | x |  | x |  |  |  | x |  | x |  |  | x |  |  | x | x |
| Hannibal (2005)57 | Denmark |  |  |  |  |  |  |  |  |  |  |  |  |  | x | x |  |  | x |
| Hannibal, Pedersen, Hestbaek, Sorensen & Munk-Jorgensen (2012)58 | Denmark |  |  |  |  |  |  |  |  |  |  | x |  |  |  |  |  |  | x |
| **Hara (1999)59** | USA |  | x | x | x |  |  | x |  |  |  |  | x | x | x |  | x | x | x |
| **Heaney (1992)60** | USA |  |  |  |  |  |  |  |  | x | x | x |  |  |  |  |  |  |  |
| **Hopster (2005)61** | Germany |  | x |  |  |  |  |  |  |  |  |  |  | x |  |  | x |  |  |
| Hudson Smith (1991)62 | USA |  | x | x |  |  |  |  |  |  |  |  |  |  | x |  | x | x | x |
| Jensen (2000)63 | Denmark | x | x | x | x |  |  | x | x | x |  |  |  | x | x | x |  |  | x |
| Jensen (2002)64 | Denmark | x |  | x | x | x |  | x | x |  |  |  |  | x | x |  | x |  | x |
| **Leite (2008)65** | Portugal |  |  | x | x | x |  | x | x | x | x |  | x | x | x | x | x |  | x |
| **Lindvang & Frederiksen (2008)66** | Denmark |  | x | x |  |  |  |  |  | x |  | x | x |  | x | x |  | x | x |
| Lindvang (2005)67 | Denmark |  |  |  |  |  |  |  |  |  |  | x | x |  |  |  |  |  |  |
| Lund (2008)68 | Demark |  | x | x |  | x |  | x |  |  | x | x | x |  |  | x |  |  |  |
| **Maler, von Wietersheim, Schurbohm, & Nagel (1994)69** | Germany |  |  | x | x | x |  | x |  |  |  | x |  |  |  |  |  |  |  |
| **Metzner (2003)70** | Germany |  | x |  |  | x | x |  |  |  |  | x |  |  | x |  |  |  | x |
| Metzner (2010)71 | Germany |  |  |  |  |  |  | x |  |  |  | x |  |  |  |  |  | x |  |
| Moe (2002)72 | Denmark |  | x |  |  | x |  | x |  |  |  |  |  |  | x |  |  |  |  |
| Moe, Roesen & Raben (2000)73 | Denmark |  |  |  |  | x |  | x |  |  |  |  |  | x | x | x |  |  | x |
| **Morgan, Bartrop, Telfer & Tennant (2011)74** | Australia |  | x | x | x | x | x |  |  |  |  |  |  | x | x |  |  |  | x |
| Moss (1999)75 | UK | x | x | x | x |  | x |  |  |  |  | x |  |  |  |  |  |  |  |
| Mossler, Fuchs, Heldal, Karterud, Kenner, Naesheim & Gold (2011)76 | Multicentre European |  |  |  |  |  |  | x |  |  |  |  | x | x | x | x |  | x | x |
| Moura Costa & Negreiros Vianna (2011)77 | Brazil | x | x | x |  | x | x | x |  |  |  |  |  | x | x |  |  |  | x |
| **Murphy (1991)78** | USA | x | x |  | x | x |  | x | x | x |  | x |  |  | x | x | x |  |  |
| **Murphy (1992)79** | USA | x | x | x |  |  |  | x | x | x | x |  | x | x | x | x |  |  | x |
| **Nolan & Ierardi (2007)80** | USA |  | x | x | x | x | x | x | x |  |  |  |  | x | x |  |  |  |  |
| **Nolan (1991)81** | USA |  |  |  | x |  |  | x | x |  |  |  |  |  |  |  | x |  | x |
| Odell-Miller (1986)82 | UK | x |  | x | x |  |  | x | x |  | x |  |  | x | x |  |  |  |  |
| Odell-Miller (1992) 12 | UK |  |  |  |  | x |  | x | x |  | x | x |  | x |  |  |  |  |  |
| Odell-Miller (2001)83 | UK |  |  |  |  |  | x | x |  |  | x |  |  |  |  |  |  |  |  |
| Odell-Miller, Hughes & Westacott (2006)84 | UK |  |  |  | x |  |  | x |  |  |  |  |  |  |  | x |  |  |  |
| **Pavlicevic (1987)85** | UK |  |  |  |  |  |  |  |  |  |  | x |  |  |  | x | x | x | x |
| Priestley (1975)86 | UK | x | x | x | x |  |  | x | x | x |  | x | x | x | x | x | x |  |  |
| **Procter (2002)87** | UK |  |  |  | x |  |  | x | x | x |  |  |  |  |  |  |  |  | x |
| Ragland (1973)88 | USA |  | x | x | x | x |  |  |  | x |  | x |  |  |  | x |  |  | x |
| **Ready (2011)89** | USA |  |  |  | x |  |  |  |  |  |  |  |  |  |  |  |  |  | x |
| **Reker (1991)90** | Germany | x | x | x | x | x |  | x |  |  |  | x |  |  | x | x | x | x |  |
| Rolvsjord (2010) 13 | Norway |  |  |  |  |  |  | x |  |  | x |  |  |  | x |  | x |  | x |
| **Rowland & Read (2011)91** | UK |  | x | x | x | x |  | x |  |  | x | x |  |  |  |  |  |  |  |
| Seitz (2002)93 | Germany |  |  |  |  |  |  |  |  |  |  |  |  |  | x |  |  |  |  |
| **Sekeles (1999)94** | Israel |  |  | x | x |  |  | x |  |  |  |  |  |  | x | x |  |  | x |
| **Shultis (1999)95** | USA |  |  | x | x |  | x | x |  |  |  |  |  |  | x | x |  |  |  |
| **Silverman & Marcionetti (2004)96** | USA |  |  | x | x |  | x | x | x |  |  |  |  | x |  |  |  |  | x |
| **Silverman (2003b)97** | USA |  | x | x |  |  |  |  |  | x |  | x |  | x | x |  |  |  | x |
| Silverman (2007)98 | USA | x | x | x | x | x | x | x | x | x | x | x |  |  |  |  |  |  |  |
| **Silverman (2009a)99** | USA |  |  | x |  |  |  | x |  |  |  |  |  | x |  |  |  | x | x |
| **Silverman (2009b)100** | USA | x |  |  |  |  |  |  | x | x |  | x | x | x |  |  | x | x | x |
| **Silverman (2010)101** | USA |  | x | x |  |  |  | x | x |  |  |  |  |  |  |  |  |  | x |
| **Silverman (2011a)102** | USA |  |  |  |  |  |  | x | x |  |  |  |  |  |  |  |  |  | x |
| **Silverman (2011b)103** | USA |  |  |  |  |  |  | x |  |  |  |  |  | x |  |  |  | x | x |
| **Sloboda (2008) 104** | UK |  |  |  | x |  |  | x |  |  | x | x | x |  |  |  |  |  | x |
| **Smith (1975)105** | USA | x |  | x | x | x |  | x |  |  |  |  |  | x |  |  |  |  |  |
| **Solli (2003)106** | Norway | x | x | x | x |  |  | x | x | x |  | x | x | x | x | x |  |  |  |
| **Solli (2006)107** | Norway | x | x | x | x |  |  | x |  |  |  |  |  |  |  |  |  |  |  |
| **Solli (2008)108** | Norway | x |  | x | x |  |  | x | x | x |  | x |  |  | x | x |  | x |  |
| **Solli (2009)109** | Norway | x | x | x | x |  |  | x | x | x | x | x | x | x | x | x | x | x | x |
| Solli & Rolvsjord (2009)110 | Norway | x | x | x | x |  |  | x |  |  |  | x |  |  | x |  |  |  | x |
| Stige (2011)111 | Norway | x | x | x | x |  | x | x |  | x |  |  |  |  | x |  |  | x | x |
| **Storz (2005)112** | Austria |  | x |  |  | x |  | x |  |  |  |  |  | x |  |  |  | x |  |
| Strehlow & Piegler (2011)113 | Germany |  | x | x | x | x | x | x |  |  |  | x |  |  | x |  |  |  |  |
| **Strunck (1986)114** | Germany |  | x | x | x |  |  | x |  |  |  |  |  | x |  | x |  |  | x |
| **Sullivan (2003)115** | USA | x |  |  |  |  |  | x | x |  |  |  |  |  |  | x |  |  | x |
| Talwar et al., (2006)116 | UK |  | x | x | x |  | x |  |  |  |  |  |  | x |  |  |  |  |  |
| **Thomas (2007)117** | USA | x | x |  | x | x | x |  | x | x | x |  | x | x | x |  | x |  | x |
| **Ulrich et al.,(2007)118** | Germany |  | x |  |  |  |  |  |  |  |  |  |  | x |  | x |  |  |  |
| Vogt-Schaeffer (1991)119 | Germany | x | x | x | x |  |  | x | x | x | x | x |  |  |  |  |  |  |  |
| **Wolfe (1996)120** | USA | x |  | x | x | x |  | x |  |  |  | x |  | x |  | x | x | x | x |
| **TOTAL** |  | 34 | 54 | 50 | 47 | 33 | 20 | 65 | 34 | 31 | 21 | 37 | 18 | 42 | 43 | 40 | 25 | 22 | 48 |

* Papers considering acute inpatient music therapy only are highlighted in bold

Clinical aims: A1 = Engagement, A2 = Interpersonal, A3 = Self-expression and communication, A4 = Emotional, A5 = Cognitive, A6 = Symptom specific, A7 = Building Resources, A8 = Issues arising from hospitalisation

Setting specific themes: S1 = Hospital environment, S2 = Institutional structure, S3 = Multidisciplinary team, S4 = Patient turnover, S5 = Short time frame

Patient specific themes: P1 = Symptom severity, P2 = Functioning level, P3 = Reaction to hospitalisation, P4 = Previous experiences of therapy, P5 = Patient engagement
